# Supplementary material
Source: MDPI journal article supplement (https://www.mdpi.com/2075-163X/14/1/14)
Supplement: s1 [file s1]

Table S3 Zircon in-situ Lu-Hf isotope compositions for pyroclastic rocks and sedimentary rocks from the Laofengkou area, West Junggar

| Sample                                       | T/Ma | $^{176}\text{Yb}/^{177}\text{Hf}$ | 2 $\sigma$ | $^{176}\text{Lu}/^{177}\text{Hf}$ | 2 $\sigma$ | $^{176}\text{Hf}/^{177}\text{Hf}$ | 2 $\sigma$ | $^{176}\text{Hf}/^{177}\text{Hf}_i$ | $\varepsilon_{\text{Hf}}(0)$ | $\varepsilon_{\text{Hf}}(t)$ | T <sub>DM1</sub> (Ma) | T <sub>DM2</sub> (Ma) | f <sub>Lu/Hf</sub> |
|----------------------------------------------|------|-----------------------------------|------------|-----------------------------------|------------|-----------------------------------|------------|-------------------------------------|------------------------------|------------------------------|-----------------------|-----------------------|--------------------|
| The dark green lithic crystal tuff (19TL-82) |      |                                   |            |                                   |            |                                   |            |                                     |                              |                              |                       |                       |                    |
| 19TL-82-01                                   | 388  | 0.034383                          | 0.000074   | 0.001051                          | 0.000002   | 0.282857                          | 0.000017   | 0.282849                            | 3.0                          | 11.3                         | 561                   | 664                   | -0.97              |
| 19TL-82-02                                   | 389  | 0.057769                          | 0.000172   | 0.001814                          | 0.000005   | 0.282847                          | 0.000019   | 0.282834                            | 2.7                          | 10.8                         | 587                   | 698                   | -0.95              |
| 19TL-82-14                                   | 390  | 0.021047                          | 0.000025   | 0.000695                          | 0.000001   | 0.282798                          | 0.000022   | 0.282793                            | 0.9                          | 9.3                          | 638                   | 790                   | -0.98              |
| 19TL-82-17                                   | 381  | 0.019735                          | 0.000049   | 0.000558                          | 0.000002   | 0.282808                          | 0.000020   | 0.282804                            | 1.3                          | 9.5                          | 622                   | 771                   | -0.98              |
| 19TL-82-22                                   | 385  | 0.030603                          | 0.000213   | 0.001005                          | 0.000006   | 0.282837                          | 0.000021   | 0.282830                            | 2.3                          | 10.5                         | 588                   | 710                   | -0.97              |
| 19TL-82-23                                   | 383  | 0.061297                          | 0.001090   | 0.002002                          | 0.000033   | 0.282793                          | 0.000029   | 0.282799                            | 0.7                          | 8.7                          | 668                   | 827                   | -0.94              |
| 19TL-82-24                                   | 381  | 0.050771                          | 0.000208   | 0.001674                          | 0.000009   | 0.282835                          | 0.000022   | 0.282823                            | 2.2                          | 10.2                         | 602                   | 727                   | -0.95              |
| 19TL-82-25                                   | 394  | 0.027074                          | 0.000190   | 0.000798                          | 0.000005   | 0.282830                          | 0.000020   | 0.282824                            | 2.0                          | 10.5                         | 596                   | 718                   | -0.98              |
| 19TL-82-27                                   | 382  | 0.049773                          | 0.001700   | 0.001359                          | 0.000044   | 0.282886                          | 0.000020   | 0.282877                            | 4.0                          | 12.1                         | 523                   | 605                   | -0.96              |
| 19TL-82-28                                   | 380  | 0.068230                          | 0.000357   | 0.002242                          | 0.000010   | 0.282815                          | 0.000022   | 0.282799                            | 1.5                          | 9.3                          | 640                   | 782                   | -0.93              |
| 19TL-82-29                                   | 380  | 0.037145                          | 0.000185   | 0.001123                          | 0.000005   | 0.282876                          | 0.000019   | 0.282868                            | 3.7                          | 11.8                         | 535                   | 627                   | -0.97              |
| 19TL-82-30                                   | 388  | 0.028992                          | 0.000311   | 0.000893                          | 0.000007   | 0.282840                          | 0.000020   | 0.282834                            | 2.4                          | 10.7                         | 582                   | 699                   | -0.97              |
| 19TL-82-32                                   | 421  | 0.024319                          | 0.000199   | 0.000774                          | 0.000005   | 0.282855                          | 0.000022   | 0.282849                            | 2.9                          | 12.0                         | 559                   | 643                   | -0.98              |
| 19TL-82-38                                   | 383  | 0.064018                          | 0.000147   | 0.001715                          | 0.000006   | 0.282907                          | 0.000019   | 0.282895                            | 4.8                          | 12.8                         | 499                   | 564                   | -0.95              |
| 19TL-82-40                                   | 381  | 0.051318                          | 0.000143   | 0.001609                          | 0.000007   | 0.282906                          | 0.000019   | 0.282895                            | 4.7                          | 12.7                         | 498                   | 565                   | -0.95              |
| 19TL-82-42                                   | 386  | 0.059650                          | 0.000382   | 0.002009                          | 0.000013   | 0.282837                          | 0.000029   | 0.282823                            | 2.3                          | 10.3                         | 604                   | 725                   | -0.94              |
| 19TL-82-44                                   | 387  | 0.030665                          | 0.000061   | 0.000965                          | 0.000002   | 0.282860                          | 0.000019   | 0.282853                            | 3.1                          | 11.4                         | 555                   | 656                   | -0.97              |
| 19TL-82-47                                   | 387  | 0.032903                          | 0.000148   | 0.001138                          | 0.000004   | 0.282886                          | 0.000029   | 0.282878                            | 4.0                          | 12.3                         | 521                   | 600                   | -0.97              |
| 19TL-82-50                                   | 393  | 0.047671                          | 0.000378   | 0.001615                          | 0.000012   | 0.282697                          | 0.000032   | 0.282685                            | -2.7                         | 5.6                          | 799                   | 1032                  | -0.95              |
| The gray-green fine sandstone (19TL-90)      |      |                                   |            |                                   |            |                                   |            |                                     |                              |                              |                       |                       |                    |
| 19TL-90-02                                   | 349  | 0.053913                          | 0.000116   | 0.001633                          | 0.000004   | 0.282901                          | 0.000019   | 0.282891                            | 4.6                          | 11.9                         | 505                   | 595                   | -0.95              |

|            |     |          |          |          |          |          |          |          |     |      |     |     |       |
|------------|-----|----------|----------|----------|----------|----------|----------|----------|-----|------|-----|-----|-------|
| 19TL-90-03 | 382 | 0.053332 | 0.000097 | 0.001492 | 0.000003 | 0.282951 | 0.000021 | 0.282941 | 6.3 | 14.4 | 432 | 460 | -0.96 |
| 19TL-90-04 | 352 | 0.052805 | 0.000367 | 0.001607 | 0.000010 | 0.283001 | 0.000018 | 0.282991 | 8.1 | 15.5 | 361 | 366 | -0.95 |
| 19TL-90-05 | 341 | 0.039902 | 0.000376 | 0.001212 | 0.000010 | 0.282949 | 0.000022 | 0.282941 | 6.2 | 13.5 | 432 | 486 | -0.96 |
| 19TL-90-07 | 346 | 0.057189 | 0.000257 | 0.001700 | 0.000007 | 0.282941 | 0.000021 | 0.282930 | 6.0 | 13.2 | 449 | 508 | -0.95 |
| 19TL-90-09 | 354 | 0.066536 | 0.000396 | 0.001974 | 0.000015 | 0.282930 | 0.000018 | 0.282916 | 5.6 | 12.9 | 469 | 533 | -0.94 |
| 19TL-90-11 | 354 | 0.047565 | 0.000217 | 0.001459 | 0.000006 | 0.282903 | 0.000020 | 0.282894 | 4.6 | 12.1 | 500 | 586 | -0.96 |
| 19TL-90-12 | 354 | 0.062401 | 0.000430 | 0.001873 | 0.000011 | 0.282890 | 0.000018 | 0.282878 | 4.2 | 11.5 | 525 | 621 | -0.94 |
| 19TL-90-13 | 347 | 0.054741 | 0.000066 | 0.001601 | 0.000004 | 0.282925 | 0.000019 | 0.282914 | 5.4 | 12.7 | 471 | 542 | -0.95 |
| 19TL-90-17 | 362 | 0.041868 | 0.000125 | 0.001240 | 0.000004 | 0.282932 | 0.000022 | 0.282923 | 5.7 | 13.3 | 457 | 512 | -0.96 |
| 19TL-90-18 | 371 | 0.064669 | 0.000490 | 0.001882 | 0.000013 | 0.282905 | 0.000020 | 0.282892 | 4.7 | 12.4 | 503 | 578 | -0.94 |
| 19TL-90-20 | 350 | 0.025465 | 0.000264 | 0.000776 | 0.000007 | 0.282936 | 0.000020 | 0.282931 | 5.8 | 13.3 | 445 | 502 | -0.98 |
| 19TL-90-22 | 352 | 0.045650 | 0.000092 | 0.001379 | 0.000002 | 0.282885 | 0.000018 | 0.282876 | 4.0 | 11.4 | 525 | 626 | -0.96 |
| 19TL-90-23 | 372 | 0.099333 | 0.000364 | 0.002699 | 0.000007 | 0.282898 | 0.000022 | 0.282879 | 4.5 | 12.0 | 526 | 606 | -0.92 |
| 19TL-90-24 | 355 | 0.034814 | 0.000254 | 0.000988 | 0.000007 | 0.282955 | 0.000015 | 0.282949 | 6.5 | 14.1 | 421 | 460 | -0.97 |
| 19TL-90-26 | 342 | 0.073939 | 0.000537 | 0.002136 | 0.000013 | 0.282897 | 0.000019 | 0.282883 | 4.4 | 11.5 | 519 | 617 | -0.94 |
| 19TL-90-28 | 340 | 0.068048 | 0.000215 | 0.001996 | 0.000004 | 0.282901 | 0.000021 | 0.282888 | 4.6 | 11.6 | 511 | 607 | -0.94 |
| 19TL-90-29 | 360 | 0.036242 | 0.000293 | 0.001092 | 0.000009 | 0.282934 | 0.000021 | 0.282926 | 5.7 | 13.4 | 452 | 507 | -0.97 |
| 19TL-90-30 | 347 | 0.063680 | 0.000707 | 0.001866 | 0.000020 | 0.282892 | 0.000020 | 0.282880 | 4.3 | 11.5 | 522 | 620 | -0.94 |
| 19TL-90-32 | 352 | 0.054965 | 0.000171 | 0.001628 | 0.000006 | 0.282940 | 0.000018 | 0.282930 | 6.0 | 13.3 | 449 | 505 | -0.95 |
| 19TL-90-35 | 344 | 0.049086 | 0.000205 | 0.001490 | 0.000007 | 0.282933 | 0.000018 | 0.282923 | 5.7 | 12.9 | 458 | 524 | -0.96 |
| 19TL-90-37 | 341 | 0.049459 | 0.000037 | 0.001564 | 0.000001 | 0.282943 | 0.000022 | 0.282933 | 6.1 | 13.2 | 444 | 503 | -0.95 |
| 19TL-90-40 | 348 | 0.068047 | 0.001020 | 0.002009 | 0.000031 | 0.282933 | 0.000021 | 0.282920 | 5.7 | 12.9 | 464 | 528 | -0.94 |
| 19TL-90-41 | 350 | 0.072054 | 0.000591 | 0.001922 | 0.000018 | 0.282913 | 0.000020 | 0.282900 | 5.0 | 12.2 | 493 | 573 | -0.94 |
| 19TL-90-43 | 352 | 0.094981 | 0.001200 | 0.002641 | 0.000031 | 0.282918 | 0.000025 | 0.282901 | 5.2 | 12.3 | 495 | 570 | -0.92 |
| 19TL-90-45 | 356 | 0.054763 | 0.000197 | 0.001665 | 0.000004 | 0.282980 | 0.000019 | 0.282969 | 7.4 | 14.8 | 392 | 413 | -0.95 |

|            |     |          |          |          |          |          |          |          |     |      |     |     |       |
|------------|-----|----------|----------|----------|----------|----------|----------|----------|-----|------|-----|-----|-------|
| 19TL-90-48 | 365 | 0.052054 | 0.000196 | 0.001524 | 0.000007 | 0.282951 | 0.000020 | 0.282941 | 6.3 | 14.0 | 432 | 471 | -0.95 |
| 19TL-90-50 | 355 | 0.051277 | 0.000184 | 0.001545 | 0.000005 | 0.282934 | 0.000018 | 0.282923 | 5.7 | 13.2 | 458 | 517 | -0.95 |

Note:  $(^{176}\text{Hf}/^{177}\text{Hf})_i = (^{176}\text{Hf}/^{177}\text{Hf})_s - (^{176}\text{Lu}/^{177}\text{Hf})_s \times (e^{\lambda t} - 1)$

$\varepsilon_{\text{Hf}}(t) = 10000 \times \{ (^{176}\text{Hf}/^{177}\text{Hf})_i / [ (^{176}\text{Hf}/^{177}\text{Hf})_{\text{CHUR},0} - (^{176}\text{Lu}/^{177}\text{Hf})_{\text{CHUR}} \times (e^{\lambda t} - 1) ] - 1 \};$

$T_{\text{DM1}} = 1/\lambda \times [ 1 + [ (^{176}\text{Hf}/^{177}\text{Hf})_s - (^{176}\text{Hf}/^{177}\text{Hf})_{\text{DM}} ] / [ (^{176}\text{Lu}/^{177}\text{Hf})_s - (^{176}\text{Lu}/^{177}\text{Hf})_{\text{DM}} ] ];$

$T_{\text{DM2}} = T_{\text{DM1}} - (T_{\text{DM1}} - T) \times (f_{\text{cc}} - f_s) / (f_{\text{cc}} - f_{\text{DM}});$

$f_{\text{Lu/Hf}} = (^{176}\text{Lu}/^{177}\text{Hf})_s / (^{176}\text{Lu}/^{177}\text{Hf})_{\text{CHUR}} - 1;$

s=sample;  $\lambda = 1.867 \times 10^{-11}$ .
