# Supplementary material
Source: MDPI journal article supplement (https://www.mdpi.com/2075-163X/14/1/14)
Supplement: s1 [file s1]

Table S1 Zircon U-Pb data of pyroclastic rocks and sedimentary rocks from the Laofengkou area, West Junggar

| Spots                                        | Common $^{204}\text{Pb}$ | $^{206}\text{Pb}$ | $^{232}\text{Th}$ | $^{238}\text{U}$ | Th/U | $^{207}\text{Pb}/^{235}\text{U}$ |         | $^{206}\text{Pb}/^{238}\text{U}$ |        | $^{207}\text{Pb}/^{235}\text{U}$ |     | $^{206}\text{Pb}/^{238}\text{U}$ |     | Conc. |
|----------------------------------------------|--------------------------|-------------------|-------------------|------------------|------|----------------------------------|---------|----------------------------------|--------|----------------------------------|-----|----------------------------------|-----|-------|
|                                              | $\times 10^{-6}$         |                   |                   | ratios           |      | 1 $\sigma$                       | ratios  | 1 $\sigma$                       | Ma     | 1 $\sigma$                       | Ma  | 1 $\sigma$                       |     |       |
| The dark green lithic crystal tuff (19TL-82) |                          |                   |                   |                  |      |                                  |         |                                  |        |                                  |     |                                  |     |       |
| 19TL-82-01                                   | 0.00                     | 25.25             | 122.59            | 310.77           | 0.39 | 0.4718                           | 0.0110  | 0.0621                           | 0.0009 | 392                              | 8   | 388                              | 6   | 98%   |
| 19TL-82-02                                   | 0.00                     | 27.98             | 165.37            | 337.60           | 0.49 | 0.4633                           | 0.0095  | 0.0622                           | 0.0007 | 387                              | 7   | 389                              | 4   | 99%   |
| 19TL-82-03                                   | 0.00                     | 21.09             | 214.55            | 238.65           | 0.90 | 0.4775                           | 0.0131  | 0.0632                           | 0.0012 | 396                              | 9   | 395                              | 7   | 99%   |
| *19TL-82-04                                  | 2.63                     | 7.95              | 35.20             | 95.90            | 0.37 | 2.0899                           | 0.4031  | 0.0932                           | 0.0105 | 1146                             | 132 | 575                              | 62  | 33%   |
| *19TL-82-05                                  | 0.00                     | 20.51             | 123.33            | 254.43           | 0.48 | 0.6322                           | 0.0343  | 0.0598                           | 0.0008 | 497                              | 21  | 374                              | 5   | 71%   |
| *19TL-82-06                                  | 2.23                     | 24.10             | 200.02            | 306.81           | 0.65 | 0.5260                           | 0.0175  | 0.0557                           | 0.0007 | 429                              | 12  | 349                              | 4   | 79%   |
| *19TL-82-07                                  | 4.46                     | 41.10             | 313.68            | 494.86           | 0.63 | 0.5877                           | 0.0427  | 0.0654                           | 0.0022 | 469                              | 27  | 408                              | 13  | 86%   |
| *19TL-82-08                                  | 3.59                     | 22.87             | 173.92            | 281.65           | 0.62 | 0.5048                           | 0.0133  | 0.0579                           | 0.0006 | 415                              | 9   | 363                              | 4   | 86%   |
| 19TL-82-10                                   | 4.38                     | 18.37             | 107.09            | 234.17           | 0.46 | 21.9014                          | 5.2511  | 0.9900                           | 0.2474 | 3179                             | 233 | 4436                             | 801 | 66%   |
| 19TL-82-11                                   | 0.47                     | 22.76             | 156.22            | 273.06           | 0.57 | 0.4567                           | 0.0092  | 0.0614                           | 0.0007 | 382                              | 6   | 384                              | 4   | 99%   |
| 19TL-82-12                                   | 0.91                     | 19.38             | 106.52            | 236.69           | 0.45 | 0.4921                           | 0.0144  | 0.0628                           | 0.0009 | 406                              | 10  | 393                              | 6   | 96%   |
| *19TL-82-13                                  | 0.00                     | 29.84             | 347.34            | 348.32           | 1.00 | 0.4769                           | 0.0166  | 0.0571                           | 0.0007 | 396                              | 11  | 358                              | 4   | 89%   |
| 19TL-82-14                                   | 0.00                     | 5.59              | 49.38             | 64.65            | 0.76 | 0.4562                           | 0.0194  | 0.0624                           | 0.0010 | 382                              | 14  | 390                              | 6   | 97%   |
| *19TL-82-15                                  | 2.09                     | 22.05             | 147.51            | 276.25           | 0.53 | 0.6006                           | 0.0502  | 0.0639                           | 0.0026 | 478                              | 32  | 399                              | 16  | 82%   |
| *19TL-82-16                                  | 2.30                     | 29.54             | 180.07            | 298.85           | 0.60 | 17.0910                          | 10.3212 | 0.4612                           | 0.1962 | 2940                             | 579 | 2445                             | 865 | 81%   |
| 19TL-82-17                                   | 0.00                     | 5.65              | 38.31             | 68.02            | 0.56 | 0.4328                           | 0.0209  | 0.0608                           | 0.0008 | 365                              | 15  | 381                              | 5   | 95%   |
| 19TL-82-18                                   | 0.00                     | 14.50             | 58.86             | 182.62           | 0.32 | 0.5120                           | 0.0194  | 0.0608                           | 0.0006 | 420                              | 13  | 381                              | 4   | 90%   |
| *19TL-82-19                                  | 0.00                     | 15.44             | 50.06             | 195.66           | 0.26 | 11.9960                          | 4.5124  | 0.3294                           | 0.0675 | 2604                             | 353 | 1836                             | 327 | 65%   |
| 19TL-82-20                                   | 3.08                     | 19.51             | 102.48            | 236.41           | 0.43 | 0.4653                           | 0.0135  | 0.0625                           | 0.0008 | 388                              | 9   | 391                              | 5   | 99%   |
| *19TL-82-21                                  | 3.92                     | 17.31             | 87.20             | 217.09           | 0.40 | 0.3150                           | 0.0829  | 0.0597                           | 0.0013 | 278                              | 64  | 374                              | 8   | 70%   |

|             |      |       |        |        |      |         |         |        |        |      |     |      |     |     |
|-------------|------|-------|--------|--------|------|---------|---------|--------|--------|------|-----|------|-----|-----|
| 19TL-82-22  | 3.11 | 9.54  | 69.65  | 112.59 | 0.62 | 0.5012  | 0.0186  | 0.0616 | 0.0009 | 413  | 13  | 385  | 6   | 93% |
| 19TL-82-23  | 1.96 | 12.77 | 64.24  | 159.80 | 0.40 | 0.5130  | 0.0253  | 0.0611 | 0.0010 | 420  | 17  | 383  | 6   | 90% |
| 19TL-82-24  | 0.00 | 31.57 | 202.29 | 375.04 | 0.54 | 0.4622  | 0.0084  | 0.0609 | 0.0006 | 386  | 6   | 381  | 4   | 98% |
| 19TL-82-25  | 0.00 | 7.05  | 44.89  | 82.88  | 0.54 | 0.4625  | 0.0184  | 0.0631 | 0.0009 | 386  | 13  | 394  | 5   | 97% |
| *19TL-82-26 | 0.70 | 19.72 | 98.32  | 234.44 | 0.42 | 10.8713 | 6.2116  | 0.2124 | 0.0639 | 2512 | 531 | 1241 | 340 | 32% |
| 19TL-82-27  | 3.41 | 9.07  | 95.63  | 98.97  | 0.97 | 0.4437  | 0.0185  | 0.0611 | 0.0009 | 373  | 13  | 382  | 6   | 97% |
| 19TL-82-28  | 0.00 | 29.16 | 206.15 | 344.76 | 0.60 | 0.4783  | 0.0112  | 0.0608 | 0.0007 | 397  | 8   | 380  | 4   | 95% |
| 19TL-82-29  | 1.95 | 33.09 | 231.03 | 406.53 | 0.57 | 0.4560  | 0.0103  | 0.0607 | 0.0006 | 382  | 7   | 380  | 3   | 99% |
| 19TL-82-30  | 0.00 | 16.87 | 109.26 | 200.24 | 0.55 | 0.4954  | 0.0130  | 0.0620 | 0.0008 | 409  | 9   | 388  | 5   | 94% |
| 19TL-82-31  | 0.00 | 20.25 | 99.10  | 251.52 | 0.39 | 0.4943  | 0.0133  | 0.0628 | 0.0009 | 408  | 9   | 392  | 6   | 96% |
| 19TL-82-32  | 1.22 | 6.86  | 25.80  | 83.91  | 0.31 | 0.4980  | 0.0219  | 0.0675 | 0.0011 | 410  | 15  | 421  | 7   | 97% |
| *19TL-82-33 | 0.04 | 27.76 | 184.34 | 323.10 | 0.57 | 0.5239  | 0.0212  | 0.0618 | 0.0006 | 428  | 14  | 387  | 4   | 89% |
| 19TL-82-34  | 2.71 | 15.93 | 67.30  | 198.54 | 0.34 | 0.5010  | 0.0142  | 0.0634 | 0.0010 | 412  | 10  | 397  | 6   | 96% |
| *19TL-82-35 | 0.00 | 37.86 | 174.83 | 421.98 | 0.41 | 0.6521  | 0.0378  | 0.0687 | 0.0008 | 510  | 23  | 428  | 5   | 82% |
| 19TL-82-36  | 0.00 | 22.57 | 150.05 | 264.62 | 0.57 | 0.4779  | 0.0111  | 0.0639 | 0.0011 | 397  | 8   | 399  | 6   | 99% |
| *19TL-82-37 | 0.00 | 27.51 | 173.42 | 333.03 | 0.52 | 53.8311 | 29.9932 | 0.7521 | 0.1929 | 4066 | 555 | 3615 | 710 | 88% |
| 19TL-82-38  | 0.00 | 30.79 | 299.59 | 345.27 | 0.87 | 0.4706  | 0.0096  | 0.0612 | 0.0007 | 392  | 7   | 383  | 4   | 97% |
| *19TL-82-39 | 0.00 | 9.65  | 70.95  | 113.88 | 0.62 | 8.5440  | 5.3220  | 0.2793 | 0.1076 | 2291 | 566 | 1588 | 542 | 63% |
| 19TL-82-40  | 2.96 | 14.43 | 62.21  | 187.01 | 0.33 | 0.4701  | 0.0116  | 0.0608 | 0.0007 | 391  | 8   | 381  | 5   | 97% |
| *19TL-82-41 | 0.00 | 20.41 | 134.86 | 273.70 | 0.49 | 17.4240 | 11.7630 | 0.7203 | 0.1731 | 2958 | 648 | 3497 | 648 | 83% |
| 19TL-82-42  | 0.00 | 20.23 | 158.61 | 245.58 | 0.65 | 0.5020  | 0.0237  | 0.0617 | 0.0010 | 413  | 16  | 386  | 6   | 93% |
| 19TL-82-43  | 0.00 | 7.14  | 58.15  | 82.71  | 0.70 | 0.4440  | 0.0170  | 0.0618 | 0.0008 | 373  | 12  | 386  | 5   | 96% |
| 19TL-82-44  | 1.76 | 8.00  | 34.88  | 99.65  | 0.35 | 0.4532  | 0.0148  | 0.0618 | 0.0007 | 380  | 10  | 387  | 4   | 98% |
| *19TL-82-45 | 0.00 | 26.17 | 226.99 | 307.13 | 0.74 | 0.6908  | 0.0304  | 0.0632 | 0.0006 | 533  | 18  | 395  | 4   | 70% |
| 19TL-82-46  | 0.00 | 16.27 | 73.76  | 199.47 | 0.37 | 0.4674  | 0.0132  | 0.0635 | 0.0010 | 389  | 9   | 397  | 6   | 98% |

|                                         |      |       |        |        |      |        |        |        |        |     |    |     |   |     |
|-----------------------------------------|------|-------|--------|--------|------|--------|--------|--------|--------|-----|----|-----|---|-----|
| 19TL-82-47                              | 6.05 | 14.23 | 63.61  | 180.15 | 0.35 | 0.5089 | 0.0192 | 0.0619 | 0.0009 | 418 | 13 | 387 | 6 | 92% |
| 19TL-82-48                              | 0.00 | 11.84 | 107.34 | 132.14 | 0.81 | 0.4862 | 0.0143 | 0.0617 | 0.0008 | 402 | 10 | 386 | 5 | 95% |
| *19TL-82-49                             | 5.36 | 21.30 | 144.82 | 263.11 | 0.55 | 0.5885 | 0.0572 | 0.0587 | 0.0008 | 470 | 37 | 368 | 5 | 75% |
| 19TL-82-50                              | 4.48 | 13.51 | 63.01  | 166.06 | 0.38 | 0.5072 | 0.0177 | 0.0629 | 0.0009 | 417 | 12 | 393 | 5 | 94% |
| The gray-green fine sandstone (19TL-90) |      |       |        |        |      |        |        |        |        |     |    |     |   |     |
| 19TL-90-01                              | 0.00 | 23.10 | 179.91 | 313.14 | 0.57 | 0.4114 | 0.0091 | 0.0560 | 0.0009 | 350 | 7  | 351 | 5 | 99% |
| 19TL-90-02                              | 0.00 | 8.22  | 55.08  | 114.07 | 0.48 | 0.4105 | 0.0142 | 0.0557 | 0.0006 | 349 | 10 | 349 | 4 | 99% |
| 19TL-90-03                              | 1.50 | 10.67 | 90.47  | 128.16 | 0.71 | 0.4585 | 0.0153 | 0.0611 | 0.0009 | 383 | 11 | 382 | 5 | 99% |
| 19TL-90-04                              | 0.00 | 24.82 | 187.79 | 333.22 | 0.56 | 0.4140 | 0.0092 | 0.0561 | 0.0007 | 352 | 7  | 352 | 5 | 99% |
| 19TL-90-05                              | 0.00 | 8.50  | 49.07  | 123.25 | 0.40 | 0.4124 | 0.0159 | 0.0544 | 0.0007 | 351 | 11 | 341 | 5 | 97% |
| 19TL-90-06                              | 4.31 | 6.51  | 56.81  | 85.57  | 0.66 | 0.4209 | 0.0164 | 0.0545 | 0.0006 | 357 | 12 | 342 | 4 | 95% |
| 19TL-90-07                              | 1.44 | 28.92 | 255.90 | 383.25 | 0.67 | 0.4065 | 0.0080 | 0.0552 | 0.0006 | 346 | 6  | 346 | 4 | 99% |
| 19TL-90-08                              | 0.00 | 8.70  | 61.11  | 120.80 | 0.51 | 0.4108 | 0.0152 | 0.0551 | 0.0007 | 349 | 11 | 346 | 4 | 98% |
| 19TL-90-09                              | 3.82 | 24.91 | 203.86 | 319.38 | 0.64 | 0.4195 | 0.0104 | 0.0565 | 0.0008 | 356 | 7  | 354 | 5 | 99% |
| 19TL-90-10                              | 0.00 | 29.69 | 215.34 | 401.47 | 0.54 | 0.4129 | 0.0101 | 0.0563 | 0.0009 | 351 | 7  | 353 | 6 | 99% |
| 19TL-90-11                              | 0.66 | 22.53 | 159.11 | 303.87 | 0.52 | 0.4045 | 0.0106 | 0.0564 | 0.0008 | 345 | 8  | 354 | 5 | 97% |
| 19TL-90-12                              | 0.00 | 33.03 | 374.82 | 402.84 | 0.93 | 0.4082 | 0.0098 | 0.0564 | 0.0008 | 348 | 7  | 354 | 5 | 98% |
| 19TL-90-13                              | 1.69 | 9.00  | 72.93  | 119.71 | 0.61 | 0.4086 | 0.0171 | 0.0554 | 0.0008 | 348 | 12 | 347 | 5 | 99% |
| 19TL-90-14                              | 6.53 | 28.97 | 285.22 | 351.98 | 0.81 | 0.4358 | 0.0104 | 0.0575 | 0.0008 | 367 | 7  | 361 | 5 | 98% |
| 19TL-90-15                              | 0.00 | 11.73 | 84.54  | 157.53 | 0.54 | 0.4011 | 0.0129 | 0.0558 | 0.0007 | 342 | 9  | 350 | 4 | 97% |
| 19TL-90-16                              | 4.28 | 32.64 | 312.48 | 409.83 | 0.76 | 0.4089 | 0.0091 | 0.0560 | 0.0007 | 348 | 7  | 351 | 4 | 99% |
| 19TL-90-17                              | 0.00 | 8.63  | 54.55  | 119.00 | 0.46 | 0.4226 | 0.0187 | 0.0577 | 0.0012 | 358 | 13 | 362 | 7 | 98% |
| 19TL-90-18                              | 0.10 | 10.55 | 91.38  | 124.92 | 0.73 | 0.4517 | 0.0150 | 0.0592 | 0.0009 | 378 | 11 | 371 | 6 | 97% |
| 19TL-90-19                              | 0.44 | 38.63 | 519.07 | 465.80 | 1.11 | 0.4129 | 0.0094 | 0.0547 | 0.0006 | 351 | 7  | 343 | 4 | 97% |
| 19TL-90-20                              | 2.83 | 7.02  | 39.26  | 98.07  | 0.40 | 0.4036 | 0.0151 | 0.0558 | 0.0008 | 344 | 11 | 350 | 5 | 98% |

|            |      |       |        |        |      |        |        |        |        |     |    |     |   |     |
|------------|------|-------|--------|--------|------|--------|--------|--------|--------|-----|----|-----|---|-----|
| 19TL-90-21 | 0.00 | 8.31  | 45.00  | 113.19 | 0.40 | 0.4095 | 0.0155 | 0.0565 | 0.0008 | 349 | 11 | 354 | 5 | 98% |
| 19TL-90-22 | 0.20 | 12.42 | 100.36 | 160.84 | 0.62 | 0.4154 | 0.0105 | 0.0561 | 0.0009 | 353 | 8  | 352 | 5 | 99% |
| 19TL-90-23 | 0.00 | 24.62 | 259.82 | 285.09 | 0.91 | 0.4525 | 0.0140 | 0.0594 | 0.0013 | 379 | 10 | 372 | 8 | 98% |
| 19TL-90-24 | 0.00 | 11.58 | 85.10  | 150.68 | 0.56 | 0.4082 | 0.0165 | 0.0566 | 0.0007 | 348 | 12 | 355 | 4 | 97% |
| 19TL-90-25 | 0.00 | 49.36 | 538.70 | 605.17 | 0.89 | 0.4066 | 0.0078 | 0.0547 | 0.0007 | 346 | 6  | 343 | 4 | 99% |
| 19TL-90-26 | 2.04 | 35.53 | 312.79 | 455.25 | 0.69 | 0.4158 | 0.0086 | 0.0545 | 0.0006 | 353 | 6  | 342 | 4 | 96% |
| 19TL-90-27 | 0.00 | 23.23 | 208.64 | 291.45 | 0.72 | 0.4037 | 0.0095 | 0.0548 | 0.0006 | 344 | 7  | 344 | 3 | 99% |
| 19TL-90-28 | 0.66 | 14.97 | 86.42  | 205.74 | 0.42 | 0.4101 | 0.0148 | 0.0542 | 0.0007 | 349 | 11 | 340 | 4 | 97% |
| 19TL-90-29 | 6.22 | 9.13  | 66.64  | 111.40 | 0.60 | 0.4117 | 0.0188 | 0.0575 | 0.0008 | 350 | 14 | 360 | 5 | 97% |
| 19TL-90-30 | 3.64 | 30.97 | 242.84 | 387.69 | 0.63 | 0.4259 | 0.0107 | 0.0554 | 0.0008 | 360 | 8  | 347 | 5 | 96% |
| 19TL-90-31 | 0.00 | 20.92 | 170.94 | 265.88 | 0.64 | 0.4283 | 0.0141 | 0.0559 | 0.0008 | 362 | 10 | 351 | 5 | 96% |
| 19TL-90-32 | 0.15 | 33.78 | 352.71 | 419.90 | 0.84 | 0.4053 | 0.0093 | 0.0561 | 0.0008 | 346 | 7  | 352 | 5 | 98% |
| 19TL-90-33 | 1.84 | 24.68 | 219.37 | 315.04 | 0.70 | 0.4149 | 0.0102 | 0.0565 | 0.0008 | 352 | 7  | 354 | 5 | 99% |
| 19TL-90-34 | 1.38 | 7.48  | 40.52  | 105.78 | 0.38 | 0.4151 | 0.0157 | 0.0561 | 0.0009 | 353 | 11 | 352 | 5 | 99% |
| 19TL-90-35 | 3.02 | 37.13 | 307.91 | 498.52 | 0.62 | 0.4007 | 0.0089 | 0.0549 | 0.0007 | 342 | 6  | 344 | 4 | 99% |
| 19TL-90-36 | 2.45 | 12.79 | 75.04  | 181.40 | 0.41 | 0.4206 | 0.0131 | 0.0560 | 0.0008 | 357 | 9  | 351 | 5 | 98% |
| 19TL-90-37 | 1.75 | 20.54 | 187.69 | 280.62 | 0.67 | 0.4160 | 0.0093 | 0.0543 | 0.0006 | 353 | 7  | 341 | 4 | 96% |
| 19TL-90-38 | 2.59 | 25.69 | 200.79 | 359.59 | 0.56 | 0.4092 | 0.0095 | 0.0548 | 0.0007 | 348 | 7  | 344 | 4 | 98% |
| 19TL-90-39 | 2.42 | 28.40 | 243.23 | 390.79 | 0.62 | 0.4030 | 0.0080 | 0.0550 | 0.0006 | 344 | 6  | 345 | 4 | 99% |
| 19TL-90-40 | 0.00 | 32.87 | 340.61 | 442.36 | 0.77 | 0.4057 | 0.0083 | 0.0555 | 0.0008 | 346 | 6  | 348 | 5 | 99% |
| 19TL-90-41 | 6.85 | 16.59 | 138.25 | 230.08 | 0.60 | 0.4171 | 0.0125 | 0.0558 | 0.0007 | 354 | 9  | 350 | 4 | 98% |
| 19TL-90-42 | 0.00 | 25.33 | 296.22 | 329.77 | 0.90 | 0.4089 | 0.0122 | 0.0561 | 0.0008 | 348 | 9  | 352 | 5 | 98% |
| 19TL-90-43 | 0.00 | 17.12 | 119.65 | 248.81 | 0.48 | 0.4225 | 0.0133 | 0.0562 | 0.0007 | 358 | 9  | 352 | 4 | 98% |
| 19TL-90-44 | 0.00 | 19.35 | 126.65 | 279.25 | 0.45 | 0.4190 | 0.0121 | 0.0564 | 0.0008 | 355 | 9  | 353 | 5 | 99% |
| 19TL-90-45 | 0.00 | 31.01 | 268.87 | 433.28 | 0.62 | 0.4281 | 0.0095 | 0.0569 | 0.0009 | 362 | 7  | 356 | 5 | 98% |

|             |      |       |        |        |      |        |        |        |        |     |    |     |   |     |
|-------------|------|-------|--------|--------|------|--------|--------|--------|--------|-----|----|-----|---|-----|
| *19TL-90-46 | 0.00 | 7.80  | 62.18  | 109.33 | 0.57 | 0.4838 | 0.0212 | 0.0561 | 0.0009 | 401 | 15 | 352 | 5 | 87% |
| 19TL-90-47  | 0.00 | 7.08  | 61.08  | 99.79  | 0.61 | 0.4273 | 0.0204 | 0.0559 | 0.0008 | 361 | 15 | 350 | 5 | 96% |
| 19TL-90-48  | 0.00 | 8.44  | 48.91  | 119.70 | 0.41 | 0.4276 | 0.0143 | 0.0583 | 0.0007 | 361 | 10 | 365 | 4 | 99% |
| *19TL-90-49 | 0.00 | 7.87  | 73.43  | 108.89 | 0.67 | 0.4643 | 0.0177 | 0.0556 | 0.0007 | 387 | 12 | 349 | 4 | 89% |
| 19TL-90-50  | 0.43 | 31.45 | 309.26 | 427.92 | 0.72 | 0.4274 | 0.0106 | 0.0566 | 0.0009 | 361 | 8  | 355 | 5 | 98% |

\* refer to invalid U-Pb dating spots with discordance greater than 10%.
