# Supplementary material
Source: MDPI journal article supplement (https://www.mdpi.com/2075-163X/14/1/14)
Supplement: s1 [file s1]

Table S4 Whole-rock major (wt.%) and trace element ( $\times 10^{-6}$ ) compositions for pyroclastic rocks and sedimentary rocks from the Laofengkou area, West Junggar

| Rock type                                   | The dark green lithic crystal tuff |         | The gray-green fine sandstone |         |
|---------------------------------------------|------------------------------------|---------|-------------------------------|---------|
| Sample                                      | 19TL-80                            | 19TL-81 | 19TL-88                       | 19TL-89 |
| SiO <sub>2</sub>                            | 60.59                              | 61.58   | 61.36                         | 62.93   |
| TiO <sub>2</sub>                            | 1.08                               | 0.97    | 0.48                          | 0.37    |
| Al <sub>2</sub> O <sub>3</sub>              | 14.13                              | 14.38   | 17.55                         | 15.85   |
| Fe <sub>2</sub> O <sub>3</sub> <sup>T</sup> | 8.31                               | 7.42    | 4.79                          | 5.47    |
| MnO                                         | 0.17                               | 0.14    | 0.12                          | 0.13    |
| MgO                                         | 2.65                               | 2.32    | 4.13                          | 3.94    |
| CaO                                         | 4.78                               | 5.11    | 1.62                          | 2.25    |
| Na <sub>2</sub> O                           | 4.11                               | 3.83    | 2.56                          | 1.73    |
| K <sub>2</sub> O                            | 1.15                               | 1.33    | 3.31                          | 2.98    |
| P <sub>2</sub> O <sub>5</sub>               | 0.25                               | 0.22    | 0.20                          | 0.11    |
| LOI                                         | 2.34                               | 2.19    | 3.95                          | 4.02    |
| Total                                       | 99.56                              | 99.49   | 100.08                        | 99.78   |
| Li                                          | 10.4                               | 11.2    | 49.7                          | 48.0    |
| Be                                          | 0.8                                | 1.0     | 1.5                           | 1.3     |
| Sc                                          | 27.3                               | 21.9    | 8.9                           | 8.0     |
| Ti                                          | 6387                               | 5701    | 2831                          | 2164    |
| V                                           | 216                                | 148     | 93                            | 63      |
| Cr                                          | 7.1                                | 15.8    | 5.0                           | 3.7     |
| Mn                                          | 1322                               | 1099    | 966                           | 1025    |
| Co                                          | 16.3                               | 14.3    | 9.8                           | 11.9    |
| Ni                                          | 5.3                                | 6.9     | 4.5                           | 6.5     |
| Cu                                          | 45.4                               | 30.1    | 51.8                          | 8.5     |
| Zn                                          | 88.3                               | 84.7    | 77.1                          | 83.0    |
| Ga                                          | 20.2                               | 18.8    | 19.4                          | 18.1    |
| Rb                                          | 15.4                               | 19.5    | 68.1                          | 64.1    |
| Sr                                          | 286.4                              | 566.9   | 175.0                         | 228.1   |
| Y                                           | 28.1                               | 24.5    | 25.5                          | 17.9    |
| Zr                                          | 90.9                               | 100.3   | 143.1                         | 114.6   |
| Nb                                          | 2.9                                | 3.6     | 7.3                           | 6.6     |
| Mo                                          | 1.0                                | 0.5     | 0.3                           | 0.3     |
| Sn                                          | 0.9                                | 0.9     | 1.1                           | 1.2     |
| Cs                                          | 0.7                                | 0.7     | 2.3                           | 1.8     |
| Ba                                          | 151                                | 312     | 575                           | 606     |
| La                                          | 9.1                                | 10.5    | 34.4                          | 28.1    |
| Ce                                          | 21.2                               | 23.0    | 67.9                          | 48.7    |
| Pr                                          | 3.25                               | 3.40    | 7.93                          | 5.52    |
| Nd                                          | 15.4                               | 15.6    | 28.9                          | 19.7    |

|                      |       |       |        |        |
|----------------------|-------|-------|--------|--------|
| Sm                   | 4.21  | 4.09  | 5.37   | 3.68   |
| Eu                   | 1.42  | 1.30  | 1.11   | 0.83   |
| Gd                   | 4.72  | 4.33  | 4.60   | 2.97   |
| Tb                   | 0.82  | 0.74  | 0.74   | 0.48   |
| Dy                   | 4.84  | 4.29  | 4.10   | 2.69   |
| Ho                   | 1.03  | 0.91  | 0.86   | 0.57   |
| Er                   | 2.89  | 2.51  | 2.40   | 1.64   |
| Tm                   | 0.46  | 0.40  | 0.38   | 0.28   |
| Yb                   | 2.85  | 2.49  | 2.46   | 1.87   |
| Lu                   | 0.42  | 0.38  | 0.39   | 0.28   |
| Hf                   | 2.8   | 3.0   | 4.4    | 3.7    |
| Ta                   | 0.2   | 0.2   | 0.6    | 0.6    |
| W                    | 0.21  | 0.13  | 0.22   | 0.11   |
| Tl                   | 0.09  | 0.11  | 0.15   | 0.15   |
| Pb                   | 3.5   | 4.8   | 7.0    | 8.9    |
| Th                   | 1.1   | 1.4   | 11.2   | 10.7   |
| U                    | 0.36  | 0.44  | 3.65   | 0.87   |
| ΣREE                 | 72.65 | 73.98 | 161.49 | 117.23 |
| δEu                  | 0.97  | 0.94  | 0.66   | 0.74   |
| (La/Yb) <sub>N</sub> | 2.30  | 3.04  | 10.00  | 10.79  |

Note: LOI = loss on ignition;  $\delta\text{Eu}=2\text{Eu}_\text{N}/(\text{Sm}_\text{N}+\text{Gd}_\text{N})$ ;  $(\text{La}/\text{Yb})_\text{N}=(\text{La}/0.237)/(\text{Yb}/0.17)$
