# Supplementary material
Source: MDPI journal article supplement (https://www.mdpi.com/2075-163X/14/1/14)
Supplement: s1 [file s1]

Table S2 Rare earth element compositions ( $\times 10^{-6}$ ) of zircons for pyroclastic rocks and sedimentary rocks from the Laofengkou area, West Junggar

| Sample                                       | La   | Ce    | Pr   | Nd   | Sm   | Eu   | Gd    | Tb    | Dy     | Ho    | Er     | Tm    | Yb     | Lu     |
|----------------------------------------------|------|-------|------|------|------|------|-------|-------|--------|-------|--------|-------|--------|--------|
| The dark green lithic crystal tuff (19TL-82) |      |       |      |      |      |      |       |       |        |       |        |       |        |        |
| 19TL-82-01                                   | 0.00 | 19.51 | 0.03 | 0.60 | 1.76 | 0.93 | 11.28 | 4.10  | 51.91  | 21.53 | 108.34 | 26.79 | 288.49 | 67.78  |
| 19TL-82-02                                   | 0.00 | 33.78 | 0.04 | 0.89 | 2.77 | 1.51 | 20.42 | 7.75  | 100.74 | 42.77 | 217.35 | 52.08 | 546.96 | 128.18 |
| 19TL-82-03                                   | 0.03 | 17.79 | 0.07 | 1.29 | 2.51 | 0.89 | 14.45 | 5.27  | 67.20  | 29.58 | 153.60 | 37.08 | 393.49 | 91.28  |
| 19TL-82-04                                   | 0.04 | 8.17  | 0.06 | 1.03 | 2.34 | 0.81 | 12.15 | 4.14  | 52.79  | 23.20 | 117.85 | 28.57 | 305.44 | 71.95  |
| 19TL-82-05                                   | 0.10 | 20.86 | 0.08 | 0.93 | 1.94 | 1.09 | 11.97 | 4.23  | 55.12  | 23.46 | 122.11 | 29.81 | 321.04 | 77.75  |
| 19TL-82-06                                   | 0.07 | 27.10 | 0.11 | 1.35 | 2.82 | 1.75 | 18.76 | 6.60  | 81.41  | 33.63 | 164.76 | 39.27 | 409.06 | 95.71  |
| 19TL-82-07                                   | 0.03 | 36.11 | 0.07 | 1.30 | 3.23 | 1.88 | 20.75 | 7.25  | 87.58  | 35.68 | 175.00 | 40.95 | 422.19 | 98.27  |
| 19TL-82-08                                   | 0.01 | 19.73 | 0.04 | 0.71 | 1.81 | 1.16 | 12.77 | 4.59  | 56.43  | 24.37 | 124.63 | 30.14 | 325.50 | 79.99  |
| 19TL-82-10                                   | 0.06 | 20.36 | 0.08 | 1.24 | 2.62 | 1.46 | 16.62 | 5.77  | 74.19  | 30.53 | 154.57 | 37.63 | 394.93 | 93.41  |
| 19TL-82-11                                   | 0.02 | 16.63 | 0.06 | 0.85 | 1.63 | 0.88 | 9.71  | 3.49  | 43.11  | 18.56 | 97.04  | 23.53 | 254.42 | 63.18  |
| 19TL-82-12                                   | 0.01 | 18.30 | 0.03 | 0.64 | 1.50 | 0.98 | 11.79 | 4.16  | 57.44  | 24.36 | 129.22 | 31.91 | 342.18 | 84.51  |
| 19TL-82-13                                   | 0.02 | 54.37 | 0.19 | 3.14 | 8.59 | 2.65 | 56.11 | 19.81 | 246.18 | 97.01 | 439.23 | 90.63 | 804.38 | 166.75 |
| 19TL-82-14                                   | 0.01 | 8.67  | 0.10 | 1.18 | 1.40 | 0.95 | 6.00  | 1.67  | 19.97  | 8.39  | 44.94  | 12.11 | 143.89 | 39.16  |
| 19TL-82-15                                   | 0.03 | 23.86 | 0.06 | 1.03 | 2.43 | 1.26 | 14.57 | 5.01  | 63.33  | 26.41 | 134.08 | 32.60 | 346.40 | 83.04  |
| 19TL-82-16                                   | 0.03 | 24.75 | 0.05 | 0.99 | 2.58 | 1.45 | 16.26 | 6.09  | 75.84  | 32.92 | 167.70 | 41.04 | 433.35 | 102.37 |
| 19TL-82-17                                   | 0.00 | 16.45 | 0.03 | 0.69 | 1.56 | 0.71 | 8.03  | 2.68  | 30.95  | 12.48 | 58.57  | 13.48 | 134.16 | 28.55  |
| 19TL-82-18                                   | 0.03 | 12.65 | 0.04 | 0.59 | 1.51 | 0.88 | 9.85  | 3.92  | 52.03  | 21.64 | 116.11 | 28.65 | 314.06 | 78.14  |
| 19TL-82-19                                   | 0.02 | 9.79  | 0.03 | 0.42 | 0.92 | 0.42 | 5.37  | 1.74  | 22.23  | 9.67  | 49.44  | 12.44 | 139.43 | 33.88  |
| 19TL-82-20                                   | 0.05 | 16.11 | 0.03 | 0.51 | 1.46 | 0.88 | 9.52  | 3.59  | 46.10  | 20.02 | 105.15 | 26.26 | 284.40 | 70.50  |
| 19TL-82-21                                   | 0.03 | 16.31 | 0.05 | 0.72 | 1.96 | 1.00 | 12.49 | 4.38  | 54.80  | 23.70 | 121.14 | 30.16 | 324.84 | 79.40  |
| 19TL-82-22                                   | 0.00 | 10.85 | 0.04 | 0.58 | 1.20 | 0.62 | 6.05  | 2.03  | 25.35  | 10.46 | 55.01  | 13.11 | 142.79 | 35.21  |

|            |      |       |      |      |      |      |       |       |        |        |        |       |        |        |
|------------|------|-------|------|------|------|------|-------|-------|--------|--------|--------|-------|--------|--------|
| 19TL-82-23 | 0.01 | 13.24 | 0.04 | 0.64 | 1.59 | 0.92 | 10.38 | 4.03  | 50.68  | 22.26  | 114.99 | 28.27 | 302.64 | 75.77  |
| 19TL-82-24 | 0.01 | 27.61 | 0.04 | 0.83 | 2.27 | 1.21 | 15.84 | 5.53  | 69.61  | 29.26  | 147.66 | 35.91 | 379.49 | 90.90  |
| 19TL-82-25 | 0.01 | 14.65 | 0.05 | 0.98 | 1.63 | 0.74 | 8.41  | 2.70  | 31.15  | 12.64  | 61.08  | 14.44 | 152.62 | 34.50  |
| 19TL-82-26 | 0.09 | 18.41 | 0.07 | 0.81 | 1.60 | 0.85 | 11.20 | 3.94  | 49.21  | 21.23  | 107.32 | 26.14 | 281.44 | 66.78  |
| 19TL-82-27 | 0.02 | 12.69 | 0.14 | 2.23 | 4.49 | 1.25 | 23.10 | 7.71  | 89.99  | 35.13  | 161.43 | 34.98 | 330.63 | 70.65  |
| 19TL-82-28 | 0.06 | 31.92 | 0.09 | 1.41 | 3.65 | 1.84 | 22.15 | 8.25  | 101.16 | 42.82  | 211.40 | 50.75 | 528.16 | 125.13 |
| 19TL-82-29 | 0.02 | 28.05 | 0.05 | 0.87 | 2.75 | 1.49 | 17.64 | 6.25  | 78.99  | 32.21  | 158.70 | 37.86 | 388.42 | 90.71  |
| 19TL-82-30 | 1.21 | 17.62 | 0.46 | 2.46 | 1.56 | 0.72 | 8.40  | 2.98  | 37.61  | 16.47  | 83.33  | 20.72 | 227.40 | 55.54  |
| 19TL-82-31 | 0.03 | 20.44 | 0.04 | 0.59 | 1.75 | 1.11 | 12.70 | 4.71  | 61.37  | 26.38  | 134.21 | 33.07 | 357.35 | 85.98  |
| 19TL-82-32 | 0.00 | 6.33  | 0.02 | 0.20 | 0.40 | 0.25 | 3.36  | 1.14  | 15.20  | 6.93   | 36.29  | 9.50  | 107.28 | 26.62  |
| 19TL-82-33 | 0.00 | 25.45 | 0.04 | 0.64 | 1.82 | 1.00 | 12.57 | 4.56  | 61.11  | 25.57  | 131.08 | 31.17 | 334.16 | 79.46  |
| 19TL-82-34 | 0.01 | 13.49 | 0.02 | 0.48 | 1.37 | 0.69 | 8.81  | 3.38  | 43.67  | 18.99  | 99.82  | 25.26 | 280.56 | 67.40  |
| 19TL-82-35 | 0.21 | 14.26 | 0.10 | 1.41 | 2.63 | 1.07 | 15.25 | 5.33  | 67.10  | 28.29  | 141.62 | 33.99 | 359.36 | 87.80  |
| 19TL-82-36 | 0.01 | 21.28 | 0.03 | 0.57 | 1.72 | 0.91 | 12.18 | 4.43  | 58.12  | 24.65  | 124.18 | 30.15 | 323.05 | 76.60  |
| 19TL-82-37 | 0.06 | 27.60 | 0.08 | 1.25 | 3.11 | 1.65 | 19.63 | 6.88  | 83.31  | 33.33  | 166.86 | 39.36 | 419.75 | 97.17  |
| 19TL-82-38 | 0.01 | 24.82 | 0.21 | 3.82 | 9.00 | 1.20 | 59.84 | 21.19 | 259.90 | 100.57 | 448.74 | 91.56 | 813.19 | 160.24 |
| 19TL-82-39 | 0.03 | 9.86  | 0.05 | 0.90 | 1.96 | 0.71 | 10.69 | 4.00  | 52.03  | 22.80  | 116.66 | 28.43 | 304.05 | 70.42  |
| 19TL-82-40 | 0.05 | 9.87  | 0.04 | 0.58 | 1.30 | 0.39 | 9.06  | 3.57  | 48.55  | 21.42  | 114.19 | 27.72 | 295.57 | 69.15  |
| 19TL-82-41 | 0.13 | 26.06 | 0.07 | 1.15 | 2.63 | 1.33 | 16.70 | 6.25  | 82.06  | 34.64  | 178.66 | 42.92 | 457.90 | 108.75 |
| 19TL-82-42 | 0.02 | 18.13 | 0.03 | 0.73 | 1.69 | 1.09 | 11.99 | 4.30  | 55.87  | 23.89  | 121.84 | 29.90 | 319.41 | 77.57  |
| 19TL-82-43 | 0.55 | 18.38 | 0.20 | 2.31 | 3.44 | 1.46 | 16.11 | 4.83  | 53.98  | 20.63  | 95.15  | 21.33 | 207.00 | 43.27  |
| 19TL-82-44 | 0.01 | 7.95  | 0.03 | 0.36 | 0.84 | 0.48 | 5.39  | 1.96  | 26.26  | 11.23  | 59.05  | 15.20 | 170.17 | 42.97  |
| 19TL-82-45 | 0.96 | 15.25 | 0.66 | 5.63 | 4.75 | 1.69 | 19.69 | 6.21  | 73.80  | 31.43  | 152.27 | 35.36 | 368.76 | 86.08  |
| 19TL-82-46 | 0.00 | 17.88 | 0.03 | 0.48 | 1.40 | 0.86 | 10.63 | 4.06  | 52.81  | 23.35  | 119.69 | 29.61 | 318.75 | 75.90  |
| 19TL-82-47 | 0.01 | 11.26 | 0.03 | 0.45 | 1.04 | 0.69 | 7.50  | 2.84  | 37.28  | 16.63  | 88.72  | 22.06 | 245.00 | 60.78  |

|                                         |      |       |      |      |      |      |       |       |        |       |        |       |        |        |
|-----------------------------------------|------|-------|------|------|------|------|-------|-------|--------|-------|--------|-------|--------|--------|
| 19TL-82-48                              | 0.02 | 12.00 | 0.07 | 0.91 | 2.15 | 0.78 | 11.31 | 4.43  | 57.43  | 25.24 | 126.69 | 29.96 | 309.00 | 70.39  |
| 19TL-82-49                              | 0.57 | 21.79 | 0.17 | 1.10 | 1.61 | 0.90 | 10.55 | 3.59  | 46.32  | 20.27 | 104.68 | 25.64 | 280.03 | 67.61  |
| 19TL-82-50                              | 0.01 | 13.46 | 0.03 | 0.49 | 1.42 | 0.79 | 9.52  | 3.56  | 45.94  | 20.71 | 109.90 | 27.57 | 301.04 | 74.69  |
| The gray-green fine sandstone (19TL-90) |      |       |      |      |      |      |       |       |        |       |        |       |        |        |
| 19TL-90-01                              | 0.05 | 20.07 | 0.04 | 0.63 | 1.64 | 0.49 | 10.20 | 4.21  | 55.91  | 24.84 | 128.65 | 32.34 | 348.68 | 81.16  |
| 19TL-90-02                              | 0.00 | 8.68  | 0.05 | 0.77 | 1.87 | 0.84 | 10.78 | 4.31  | 60.48  | 27.42 | 146.05 | 35.68 | 377.63 | 90.24  |
| 19TL-90-03                              | 0.01 | 25.11 | 0.04 | 0.85 | 2.42 | 0.49 | 15.53 | 6.35  | 87.20  | 36.86 | 180.95 | 42.28 | 423.31 | 91.01  |
| 19TL-90-04                              | 0.60 | 23.94 | 0.21 | 1.39 | 1.99 | 0.58 | 12.83 | 4.95  | 67.67  | 31.26 | 166.55 | 41.71 | 454.93 | 105.84 |
| 19TL-90-05                              | 0.01 | 8.23  | 0.02 | 0.61 | 1.35 | 0.58 | 9.67  | 3.90  | 53.92  | 24.37 | 129.75 | 32.72 | 350.15 | 85.19  |
| 19TL-90-06                              | 0.00 | 7.23  | 0.09 | 1.63 | 3.22 | 1.14 | 15.77 | 5.34  | 65.58  | 26.58 | 129.21 | 30.24 | 306.69 | 69.20  |
| 19TL-90-07                              | 0.21 | 24.65 | 0.16 | 1.47 | 2.08 | 0.78 | 13.92 | 5.28  | 73.68  | 32.18 | 168.23 | 40.80 | 436.14 | 102.83 |
| 19TL-90-08                              | 0.01 | 8.20  | 0.07 | 1.04 | 2.25 | 0.73 | 13.56 | 5.03  | 62.97  | 25.81 | 129.67 | 30.00 | 300.82 | 67.45  |
| 19TL-90-09                              | 0.28 | 15.37 | 0.17 | 1.84 | 3.19 | 1.17 | 18.61 | 7.10  | 93.75  | 39.82 | 202.05 | 48.63 | 507.47 | 118.91 |
| 19TL-90-10                              | 0.00 | 26.18 | 0.03 | 0.61 | 1.94 | 0.55 | 13.10 | 5.26  | 74.09  | 33.85 | 179.38 | 44.82 | 480.70 | 113.73 |
| 19TL-90-11                              | 0.04 | 16.50 | 0.06 | 1.00 | 2.29 | 0.66 | 14.62 | 5.52  | 74.81  | 32.31 | 169.35 | 41.72 | 455.72 | 108.68 |
| 19TL-90-12                              | 0.04 | 29.10 | 0.05 | 0.81 | 2.38 | 0.77 | 16.87 | 6.48  | 83.50  | 36.11 | 183.16 | 43.75 | 456.84 | 106.37 |
| 19TL-90-13                              | 1.21 | 13.48 | 0.34 | 1.98 | 1.67 | 0.53 | 8.87  | 3.38  | 44.04  | 18.84 | 96.02  | 23.24 | 246.46 | 56.86  |
| 19TL-90-14                              | 1.63 | 25.21 | 0.55 | 4.23 | 5.15 | 1.58 | 28.11 | 9.76  | 121.90 | 50.17 | 244.95 | 56.99 | 581.38 | 134.61 |
| 19TL-90-15                              | 2.12 | 18.86 | 0.80 | 4.44 | 2.62 | 0.91 | 11.30 | 4.27  | 56.86  | 25.40 | 135.55 | 33.19 | 360.46 | 85.03  |
| 19TL-90-16                              | 0.00 | 26.63 | 0.04 | 0.82 | 2.12 | 0.66 | 13.70 | 5.35  | 73.43  | 32.56 | 173.34 | 42.54 | 463.78 | 109.59 |
| 19TL-90-17                              | 0.00 | 8.74  | 0.04 | 0.58 | 1.68 | 0.62 | 10.32 | 4.04  | 55.42  | 24.99 | 132.59 | 32.97 | 359.16 | 83.71  |
| 19TL-90-18                              | 0.31 | 12.09 | 0.15 | 1.05 | 1.58 | 0.46 | 9.43  | 3.41  | 44.18  | 18.62 | 95.12  | 23.13 | 243.09 | 55.95  |
| 19TL-90-19                              | 0.08 | 38.39 | 0.22 | 3.85 | 7.24 | 3.83 | 38.02 | 12.38 | 146.91 | 59.83 | 285.90 | 64.00 | 651.37 | 147.87 |
| 19TL-90-20                              | 0.00 | 6.63  | 0.01 | 0.35 | 0.95 | 0.34 | 6.16  | 2.48  | 32.96  | 14.39 | 75.70  | 18.49 | 198.67 | 46.63  |
| 19TL-90-21                              | 0.01 | 7.78  | 0.02 | 0.53 | 1.43 | 0.52 | 8.94  | 3.59  | 47.66  | 21.56 | 116.78 | 29.16 | 316.13 | 76.91  |

|            |       |        |       |       |       |      |       |       |        |       |        |       |        |        |
|------------|-------|--------|-------|-------|-------|------|-------|-------|--------|-------|--------|-------|--------|--------|
| 19TL-90-22 | 2.46  | 14.69  | 0.64  | 3.29  | 2.23  | 0.72 | 10.19 | 3.94  | 52.19  | 23.31 | 118.32 | 28.98 | 312.22 | 73.57  |
| 19TL-90-23 | 0.01  | 15.91  | 0.09  | 1.75  | 4.10  | 1.69 | 27.16 | 9.65  | 123.62 | 50.87 | 239.40 | 53.10 | 514.23 | 112.09 |
| 19TL-90-24 | 0.00  | 10.16  | 0.02  | 0.51  | 1.56  | 0.38 | 10.48 | 3.91  | 50.41  | 21.15 | 104.69 | 23.81 | 237.13 | 52.88  |
| 19TL-90-25 | 0.78  | 32.73  | 0.92  | 6.39  | 5.03  | 1.70 | 22.21 | 8.08  | 101.90 | 43.55 | 221.49 | 52.91 | 548.44 | 124.72 |
| 19TL-90-26 | 0.13  | 26.70  | 0.15  | 2.67  | 5.28  | 1.78 | 33.35 | 12.39 | 157.11 | 65.90 | 327.95 | 75.39 | 751.54 | 170.02 |
| 19TL-90-27 | 0.37  | 17.81  | 0.17  | 1.79  | 3.66  | 0.88 | 20.35 | 7.54  | 96.81  | 41.36 | 202.50 | 46.79 | 467.48 | 102.35 |
| 19TL-90-28 | 0.00  | 11.99  | 0.05  | 1.04  | 2.63  | 0.95 | 15.93 | 6.27  | 84.92  | 39.33 | 209.45 | 51.20 | 532.03 | 122.78 |
| 19TL-90-29 | 0.18  | 10.85  | 0.09  | 0.74  | 1.72  | 0.44 | 9.54  | 3.68  | 46.73  | 21.21 | 109.26 | 26.52 | 275.61 | 66.46  |
| 19TL-90-30 | 0.59  | 31.67  | 0.88  | 5.03  | 3.60  | 1.25 | 15.26 | 5.90  | 80.13  | 35.60 | 185.94 | 45.51 | 471.88 | 111.19 |
| 19TL-90-31 | 1.37  | 23.94  | 1.09  | 7.55  | 4.50  | 1.32 | 15.27 | 5.12  | 68.53  | 29.61 | 155.24 | 37.82 | 403.37 | 96.93  |
| 19TL-90-32 | 0.29  | 23.75  | 0.16  | 1.37  | 2.21  | 0.61 | 12.70 | 4.80  | 62.27  | 26.77 | 134.50 | 32.70 | 335.34 | 77.80  |
| 19TL-90-33 | 0.66  | 26.09  | 0.73  | 5.10  | 3.54  | 1.11 | 14.50 | 4.95  | 66.59  | 29.63 | 155.34 | 38.73 | 418.93 | 100.55 |
| 19TL-90-34 | 0.00  | 7.13   | 0.03  | 0.36  | 1.07  | 0.34 | 6.90  | 2.70  | 36.57  | 16.66 | 86.85  | 21.49 | 231.40 | 54.04  |
| 19TL-90-35 | 0.80  | 39.35  | 0.27  | 1.61  | 2.53  | 0.66 | 15.54 | 6.04  | 84.03  | 37.66 | 195.76 | 47.21 | 507.80 | 117.93 |
| 19TL-90-36 | 0.69  | 13.52  | 0.23  | 1.76  | 2.79  | 0.86 | 15.57 | 6.27  | 85.98  | 38.25 | 195.84 | 45.85 | 473.79 | 107.79 |
| 19TL-90-37 | 0.01  | 15.31  | 0.03  | 0.72  | 1.46  | 0.99 | 10.40 | 4.23  | 61.11  | 28.35 | 155.34 | 38.98 | 427.42 | 106.91 |
| 19TL-90-38 | 0.04  | 24.59  | 0.07  | 1.03  | 2.57  | 0.81 | 16.22 | 6.24  | 82.28  | 37.18 | 198.25 | 47.62 | 511.73 | 121.25 |
| 19TL-90-39 | 0.01  | 19.68  | 0.03  | 0.54  | 1.79  | 0.57 | 12.08 | 4.77  | 65.26  | 29.57 | 152.73 | 37.40 | 399.47 | 94.04  |
| 19TL-90-40 | 0.28  | 25.41  | 0.27  | 4.36  | 8.42  | 2.47 | 44.40 | 15.34 | 186.23 | 75.85 | 360.67 | 82.49 | 818.22 | 183.75 |
| 19TL-90-41 | 0.02  | 11.27  | 0.15  | 2.63  | 5.54  | 1.09 | 31.19 | 10.78 | 137.23 | 55.83 | 269.22 | 59.22 | 558.43 | 119.78 |
| 19TL-90-42 | 0.12  | 28.98  | 0.15  | 1.72  | 3.26  | 1.72 | 23.87 | 8.85  | 116.40 | 49.49 | 247.12 | 57.73 | 609.12 | 142.70 |
| 19TL-90-43 | 0.03  | 15.26  | 0.09  | 1.56  | 4.18  | 1.32 | 25.80 | 10.05 | 135.52 | 57.88 | 288.98 | 66.82 | 665.11 | 145.72 |
| 19TL-90-44 | 0.01  | 16.18  | 0.01  | 0.48  | 1.36  | 0.45 | 10.10 | 4.00  | 56.51  | 25.78 | 139.78 | 35.28 | 386.37 | 92.58  |
| 19TL-90-45 | 1.19  | 30.82  | 0.33  | 2.02  | 2.24  | 0.59 | 14.30 | 5.44  | 77.51  | 34.84 | 180.15 | 44.26 | 475.94 | 110.37 |
| 19TL-90-46 | 53.97 | 134.14 | 15.58 | 69.33 | 14.11 | 2.15 | 18.62 | 4.57  | 48.54  | 19.42 | 95.74  | 23.15 | 248.35 | 57.33  |

|            |       |       |       |       |       |      |       |      |       |       |        |       |        |       |
|------------|-------|-------|-------|-------|-------|------|-------|------|-------|-------|--------|-------|--------|-------|
| 19TL-90-47 | 0.00  | 9.77  | 0.02  | 0.50  | 1.03  | 0.41 | 7.28  | 2.72 | 36.11 | 15.89 | 83.36  | 20.27 | 215.69 | 50.05 |
| 19TL-90-48 | 1.26  | 10.64 | 0.41  | 2.19  | 1.80  | 0.50 | 8.91  | 3.35 | 45.19 | 20.68 | 110.53 | 27.82 | 302.16 | 72.81 |
| 19TL-90-49 | 35.80 | 88.33 | 10.28 | 43.31 | 11.02 | 2.02 | 21.89 | 6.65 | 75.10 | 30.40 | 146.97 | 34.29 | 353.04 | 80.26 |
| 19TL-90-50 | 5.16  | 39.97 | 1.40  | 6.55  | 3.07  | 0.62 | 13.36 | 5.16 | 67.46 | 29.44 | 152.29 | 36.70 | 388.49 | 88.69 |
